# Supplementary material for: Effects of Low-Energy Diet or Exercise on Cardiovascular Function in Working-Age Adults With Type 2 Diabetes: A Prospective, Randomized, Open-Label, Blinded End Point Trial
Source: Oxford University Press journal article supplement (doi:10.2337/dc20-0129), 2020-03-27
Supplement: dc200129supplementarydata.pdf [file dc200129supplementarydata.pdf]

# SUPPLEMENTARY DATA

**Supplementary Figure 1.** Trial profile. Abbreviations: T2D=type 2 diabetes mellitus; MRP=meal replacement plan.

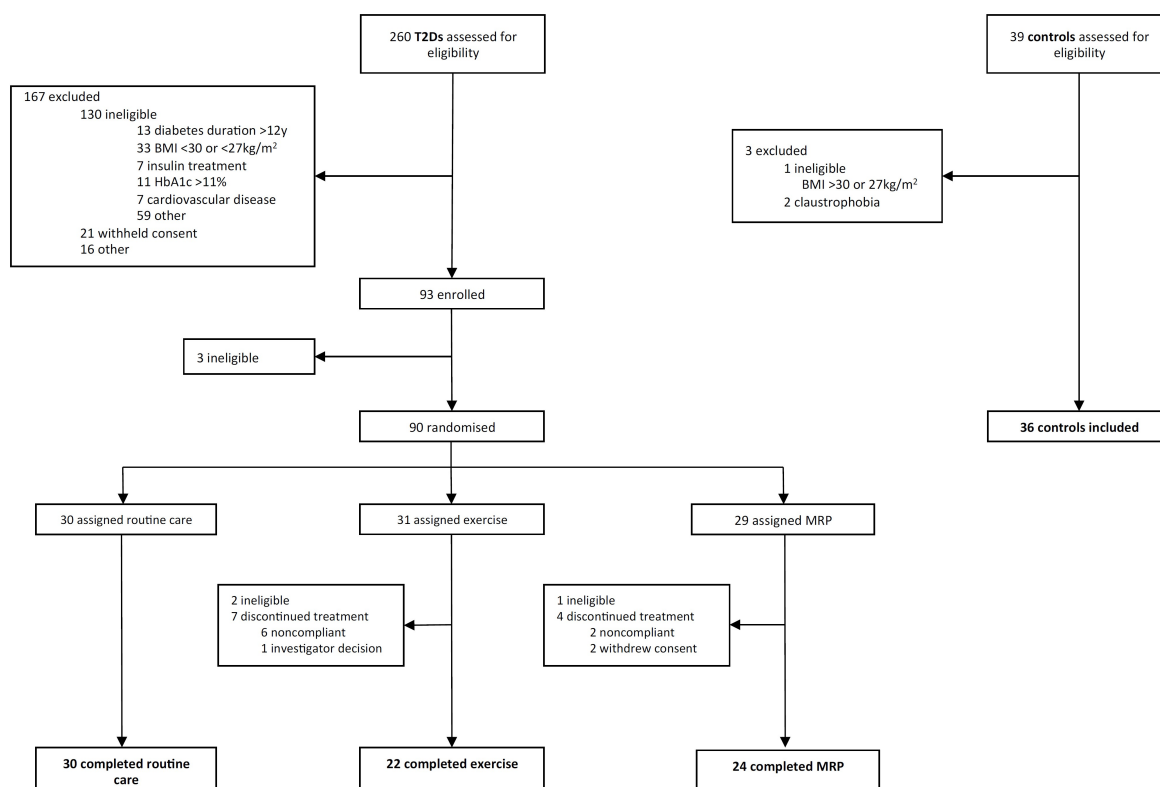

# SUPPLEMENTARY DATA

**Supplementary Table 1.** Baseline Characteristics of prospective, randomized, open-label, blinded-endpoint trial participants stratified by treatment arm.

|                                              | <b>Routine care<br/>(n=30)</b> | <b>Exercise (n=31)</b> | <b>MRP (n=29)</b> |
|----------------------------------------------|--------------------------------|------------------------|-------------------|
| <b>Age, years</b>                            | 50.7±6.4                       | 50.5±7.2               | 49.7±6.3          |
| <b>Sex</b>                                   |                                |                        |                   |
| <b>Male</b>                                  | 18 (60%)                       | 18 (58%)               | 17 (59%)          |
| <b>Female</b>                                | 12 (40%)                       | 13 (42%)               | 12 (41%)          |
| <b>Ethnic origin</b>                         |                                |                        |                   |
| <b>Caucasian</b>                             | 18 (60%)                       | 22 (71%)               | 16 (55%)          |
| <b>Black or other minority<br/>ethnicity</b> | 12 (40%)                       | 9 (29%)                | 13 (45%)          |
| <b>Weight, Kg</b>                            | 102.6±14.9                     | 102.8±18.3             | 104.6±16.9        |
| <b>Body mass index, Kg/m<sup>2</sup></b>     | 36.7±4.8                       | 36.0±5.8               | 37.2±6.1          |
| <b>Systolic BP, mmHg</b>                     | 138±13                         | 138±18                 | 144±18            |
| <b>Diastolic BP, mmHg</b>                    | 85±7                           | 88±10                  | 90±9              |
| <b>Medications</b>                           |                                |                        |                   |
| <b>RAAS inhibitor</b>                        | 15 (50%)                       | 11 (35%)               | 15 (52%)          |
| <b>Other antihypertensive(s)</b>             | 9 (30%)                        | 8 (26%)                | 11 (38%)          |
| <b>Statin</b>                                | 21 (70%)                       | 20 (65%)               | 19 (66%)          |
| <b>Metformin</b>                             | 30 (100%)                      | 29 (94%)               | 25 (86%)          |
| <b>Sulphonylurea</b>                         | 6 (20%)                        | 6 (19%)                | 2 (7%)            |
| <b>GLP-1 agonist</b>                         | 3 (10%)                        | 4 (13%)                | 3 (10%)           |
| <b>DPP-IV inhibitor</b>                      | 7 (23%)                        | 6 (19%)                | 5 (17%)           |
| <b>SGLT-2 inhibitor</b>                      | 4 (13%)                        | 3 (10%)                | 4 (14%)           |
| <b>Fasting blood tests</b>                   |                                |                        |                   |
| <b>Glucose, mmol/L</b>                       | 8.2±2.3                        | 8.9±2.4                | 8.1±2.5           |
| <b>HbA1c, %</b>                              | 7.3±0.9                        | 7.6±1.3                | 7.2±1.1           |
